# Supplementary material
Source: MDPI journal article supplement (https://www.mdpi.com/2075-5309/13/10/2417)
Supplement: s1 [file s1]

Archive with 2 entries (2 files):
- SM File S1-Calculation Toolkit-20230921.xlsx
- SM File S2.pdf
