# Supplementary material
Source: MDPI journal article supplement (https://www.mdpi.com/2075-5309/13/10/2417)
Supplement: s1 [file s1 › SM File S1-Calculation Toolkit-20230921.xlsx]

## Sheet: Introduction
Carbon Emissions of Buildings - A Toolkit based on GB/T51366
This is a calculation toolkit of carbon emissions for buildings based on the national standard GB/T 51366-2019. This toolkit is applicable to the calculation of carbon emissions in the production, construction, operation, and demolition phases, as well as production and transportation of building materials for new, expanded and renovated buildings. The results are calculated according to the nati…
										Operation
										Construction
					Input												Output					Summary table
										Demolition
																												Basic information
										Production and transport of building materials																		Mandatory fields
																												Optional fields
																												Calculation results

## Sheet: Input
	Basic information about the building					Return
	Building Overview	New Building
	Building Type	Residential building
	Building Location	Shandong		Qingdao
	Building Length				m
	Building Height				m
	Building width				m
	Number of storeys	Above Ground			floor
		Underground			floor
	Total building area				㎡
	Total building area in use				㎡
	Building common area				㎡
	Building design life				year
	Carbon sink system for building green spaces
	Type of vegetation	Trees	Bamboo forest	Grassland	Shrubland	Scattered woods + trees on all sides + open forests	Data source
	Area (ha)
	The data can be provided in two ways, firstly, by giving the specific indicators required for the calculation of energy consumption in each system according to the standard, and secondly, by providing direct statistics on the energy consumption of each system
	I. Operational phase
	Method 1
	1. HVAC system
				Type of energy	Energy consumption	Unit	Data source
	1. Cooling source			Electricity		kWh/yr
	2. Heat source			Electricity		kWh/yr
	3. Distribution systems			Electricity		kWh/yr
	4. Terminal air handling equipment			Electricity		kWh/yr
	1.1. Refrigerant use
	Serial number		Type of refrigerant	Single unit refrigerant charge (kg/unit)	Number of equipment	Equipment life (years)	Refrigerant GWP
	1
	2
	......
	Data source
	2. Domestic hot water system
					Number	Unit	Data source
	1. Design hot water temperature					°C
	2. Design cold water temperature					°C (summer)
						°C (winter)
	3. Hot water density					kg/L
	4. Hot water consumption quotas					L/person
	5. Number of units of water use calculation					Number of people or beds, whichever
	6. daily domestic hot water use hours
	7. Annual domestic hot water use hours					h
	8. hourly variation factor					\
	9. Domestic hot water heat provided by solar systems					kWh/yr
	10. Domestic hot water transmission and distribution efficiency					%
	11. Annual average efficiency of domestic hot water system heat sources					%
	3. Lighting and lift system
	3.1, Lighting (without photoelectric automatic control system)
	Types of rooms		Number of rooms	Room lighting area (m²)	Room lighting time (h)	Room lighting power density values (W/m2)	Energy consumption (kWh/a)
	1. Living room						0
	2. Bedroom						0
	3. Dining room						0
	4. Kitchen						0
	5. Bathroom						0
	6. Study room						0
						Total	0
	Data source
	3.2. Emergency light				Number	Unit	Data source
	1. Emergency lighting power					W/㎡
	2. Emergency lighting area					㎡
	3.4. Lift
					Number	Unit	Data source
	1. Specific energy consumption					mWh/kgm
	2. Average annual operating hours of lifts					h
	3. Average annual standby hours of the lift					h
	4. Lift speed					m/s
	5. Lift rated capacity					kg
	6. Energy consumption when the lift is on standby					W
	7. Number of lifts					part
	4. Renewable energy system
	4.1. Solar hot water system
					Number	Unit	Data source
	1. Solar collector area					㎡
	2. average annual solar irradiation on the solar collector surface					MJ/㎡
	3. Average collector efficiency based on the total area of the collector					%
	4. Heat loss rate of piping and thermal storage devices					%
	4.2. Photovoltaic system
					Number	Unit	Data source
	1. Annual solar irradiation on the surface of the photovoltaic cell					kWh/㎡
	2. Conversion efficiency of photovoltaic cells					%
	3. Loss efficiency of a PV cell					%
	4. Net PV panel area of a PV cell					㎡
	4.3. Wind turbine
					Number	Unit	Data source
	1. Air density					kg/m³	GB/T51366
	2. Roughness factor based on height					\
	3. Site factor					\
	4. Surface roughness factor					\
	5. Annual available average wind speed					m/s
	6. Windward area of wind turbine blades				0	㎡
	7. wind turbine blade diameter					m
	8. Factor calculated from hourly wind speeds from typical meteorological year data				#DIV/0!	\
	9. Annual average energy density					W/㎡
	10. Conversion efficiency of the wind turbine					%
	Method 2
	1. Total annual energy consumption during the operation phase
		Electricity (kWh)	Gas (m³)	Petrol (kg)	Diesel (kg)	Municipal heat (Yes/No)	Data source
	Heating
	Air conditioning					\
	Lighting					\
	Lift					\
	Domestic hot wate					\
	2. Energy provided by renewable energy systems
		Electricity (kWh)	Gas (m³)	Petrol (kg)	Diesel (kg)	Municipal heat (Yes/No)	Data source
	Heating
	Air conditioning					\
	Lighting					\
	Lift					\
	Domestic hot water					\
	II. Construction phase
	Method 1
	1. Sub-component works
	Item 1		Quantity of work						Small construction equipment	Quantity of work			Data source
	Name of machinery	Performance specifications	Energy consumption			Machine use shifts	Data source			Petrol (kg)	Diesel (kg)	Electricity (kWh)
			Petrol (kg/tablet)	Diesel (kg/tablet)	Electricity (kWh/shift)
	2. Items of measures
	Item 1		Quantity of work
	Name of machinery	Performance specifications	Energy consumption			Machine use shifts	Data source
			Petrol (kg/tablet)	Diesel (kg/tablet)	Electricity (kWh/shift)
	Other			Quantity of work			Data source
				Petrol (kg)	Diesel (kg)	Electricity (kWh)
	Other construction drainage energy consumption
	Energy consumption of temporary construction facilities
	方法二
				Petrol (kg)	Diesel (kg)	Electricity (kWh)	Data source
	1.分部分项工程
	2.小型施工机具
	3.措施项目
	4.施工降排水
	5.施工临时设施
	III. Dismantling phase
	Method 1
	Item 1		Quantity of work						Small construction equipment	Quantity of work			Data source
	Name of machinery	Performance specifications	Energy consumption			Machine use shifts	Data source			Petrol (kg)	Diesel (kg)	Electricity (kWh)
			Petrol (kg/tablet)	Diesel (kg/tablet)	Electricity (kWh/shift)
	Other			Quantity of work			Data source
				Petrol (kg)	Diesel (kg)	Electricity (kWh)
	1. Energy consumption for building blasting, static breakage demolition and mechanical monolithic demolition
	Method 2
				Petrol (kg)	Diesel (kg)	Electricity (kWh)	Data source
	1. Manual and mechanical demolition
	2. Building demolition by blasting, static breakage and mechanical monolithic demolition
	IV. Building materials production phase					Low value waste	Unit	Number	Data source
	Type of building material	Unit	Number	Data source
						Renewable waste	Unit	Number	Data source
	V. Building materials transportation phase			When the actual transport distance is unknown, the average transport distance provided by GB/T51366 is used
	Types of building materials	Unit	Number	Actual transport distance (km)	Average transport distance (km)	Mode of transport	Data source
	Waste generation during the demolition phase			Mode of transport	Actual transport distance (km)	Average transport distance (km)	Data source

## Sheet: Sheet2
		建筑物概况		建筑物类型	Residential building	Public building			省份/直辖市	Beijing	Chongqing	Shanghai	Tianjin	Hebei	Henan	Shandong	Shanxi	Shaanxi	Guangdong	Hunan	Hubei	Jiangsu	Liaoning	Jilin	Heilongjiang	Gansu	Guizhou	Sichuan	Qinghai	Yunnan	Jiangxi	Anhui	Hainan	NingxiaHuiAutonomousRegion	TibetAutonomousRegion	InnerMongoliaAutonomousRegion	GuangxiZhuangAutonomousRegion
		New Building				Office building								Shijiazhuang	Zhengzhou	Jinan	Taiyuan	Xi'an	Dongguan	Changsha	Wuhan	Suzhou	Shenyang	Changchun	Harbin	Lanzhou City	Guiyang	Chengdu	Xining City	Kunming	Nanchang	Hefei	Haikou	Yinchuan	Lhasa	Huhehaote	Guigang
		Completed building				Hospital building								Tangshan	Kaifeng	Qingdao	Datong	Xianyang	Guangzhou	Shaoyang	Yichang	Xuzhou	Dalian	Jilin	Qiqihar	Tianshui	Qiandongnan	Mianyang	Haixi Prefecture	Honghezhou	Ganzhou	Wuhu	Sanya	Wuzhong	Shannan District	Chifeng	Yulin
						Shopping centre								Baoding	Luoyang	Linyi	Yuncheng	Baoji	Zhongshan	Changde	Xiangfan	Yancheng	Dandong	Baishan	Daqing	Qingyang	Zunyi	Guangyuan	Haidong District	Dali	Shangrao	Liuan	Qionghai	Zhongwei	Linzhi	Baotou	Beihai
						School building								Handan	Pingdingshan	Jining	Changzhi	Hanzhong	Shenzhen	Hengyang	Jingzhou	Wuxi	Liaoyang	Tonghua	Jiamusi	Wuwei	Qianxinan	Dazhou	Haibei Prefecture	Wenshan	Ji'an	Suzhou	Wenchang	Shizuishan	Shigatse	Tongliao	Nanning
						Hotel building								Xingtai	Nanyang	Heze	Jincheng	Weinan	Huizhou	Zhuzhou	Enshi	Nanjing	Huludao	Baicheng	Shuangyashan	Jiuquan	Anshun	Nanchong	Guoluo Prefecture	Dehong	Jiujiang	Fuyang	Dongfang	Guyuan	Ali Prefecture	Wuhai	Liuzhou
														Hebei	Xinxiang	Yantai	Xinzhou	Ankang	Jiangmen	Xiangtan	Xiaogan	Nantong	Jinzhou	Yanbian	Mudanjiang	Zhangye	Liusui Pan	Deyang	Yushu Prefecture	Qujing	Xinyu	Anqing	Changjiangxian		Changdu	Erdos	Guilin
														Cangzhou	Anyang	Weihai	Linfen	Yulin	Zhuhai	yongzhou	Huanggang	Lianyungang	Chaoyang	Songyuan	Jixi	Baiyin	Bijie Prefecture	Guang'an	Huangnanzangzuzizhiqu	Zhaotong	fuzhou	Maanshan	Lingshui county		Nagqu	Hulunbeier	Wuzhou
														Qinhuangdao	Xinyang	Tai'an	lvliang	Shangluo	Shantou	Yueyang	Tuoyan	Changzhou	yingkou	Liaoyuan	Heihe	Pingliang	Tongren	Aba		Chuxiong	yichun	Bengbu	Ledongxian				Qinzhou
														Zhangjiakou	zhoukou	Zibo	jinzhong	Yan'an	Foshan	Huaihua	Xianning	Yangzhou	Panjin	Siping	Suihua	Jiayuguan		Bazhong		Baoshan	jingdezhen	Huaibei	Wuzhishan				Laibin
														Hengshui	Shangqiu	Weifang	Yangquan	Tongchuan	Zhanjiang	chenzhou	Huangshi	Zhenjiang	Tieling		Hegang	Linxia Hui Autonomous Region		suining		Yuxi	Pingxiang	Huainan	Baoting				Hechi
														Langfang	jiaozuo	Rizhao	Shuozhou		Heyuan	Loudi	Xiantao	Huai'an	Anshan		Yichun	Jinchang		Neijiang		Lijiang	Yingtan	Xuancheng	Chengmai County				Baise
														Chengde	Zhumadian	binzhou			Zhaoqing	Yiyang	Suizhou	Taizhou	Fushun		Qitaihe	Gannan		Liangshan		Lincang		Huangshan	Wanning				Hezhou
															Puyang	Dongying			Chaozhou	Zhangjiajie	Tianmen	Suqian	Fuxin					Panzhihua		Simao		Tongling	Danzhou				Chongzuo
															sanmenxia	liaocheng			Qingyuan	Xiangxi	jingmen		本溪市					Leshan		Xishuangbanna Prefecture		millionday	Lingao County				Fangchenggang
															luohe	Dezhou			Shaoguan		Qianjiang							Zigong		Nujiang		chizhou	Baisha county
															Xuchang	Laiwu			Jieyang		Ezhou							Luzhou		Diqing		Chaohu	Ding'an county
															Hebi	Zaozhuang			yangjiang									Ya'an				Chuzhou	Qiongzhongxian
															Jiyuan				Yunfu									Yibin					屯昌县
																			Maoming									ziyang
																			Meizhou									Meishan
																			Shanwei									Ganzi

## Sheet: Output
											Return
	I. Operational phase					I. Operational phase
	Method 1					Method 2
	1. HVAC system					1. HVAC system
		Number	Unit				Number	Unit
	1. Energy consumption of HVAC systems	0	kWh/yr			1. Energy consumption of HVAC systems	0	kWh/yr
	2. Carbon emissions from refrigerant use	#DIV/0!	kgCO2/yr			2. Carbon emissions from refrigerant use	#DIV/0!	kgCO2/yr
	2. Domestic hot water system					2. Domestic hot water system
		Number	Unit				Number	Unit
	1. Average hourly domestic hot water heat consumption	#DIV/0!	kW/h			3. Annual energy consumption for domestic hot water	0	kWh/yr
	2. Annual heat consumption for domestic hot water	#DIV/0!	kWh/yr
	3. Annual energy consumption for domestic hot water	#DIV/0!	kWh/yr
	3.2. Emergency light					3.2. Emergency light
		Number	Unit				Number	Unit
	1. Annual energy consumption of lighting systems	0	kWh/yr			1. Annual energy consumption of lighting systems	0	kWh/yr
	2. Annual elevator energy consumption	0	kWh/yr			2. Annual elevator energy consumption	0	kWh/yr
	4. Renewable energy system					4. Renewable energy system
		Number	Unit				Number	Unit
	1. Annual energy supply of solar water heating systems	0	kWh			1. Annual energy supply of solar water heating systems	0	kWh
	2. Annual electricity production of the PV system	0	kWh			2. Annual electricity production of the PV system	0	kWh
	3. Annual electricity production from wind turbines	0	kWh			3. Annual electricity production from wind turbines	0	kWh
	5、Carbon emissions					5、Carbon emissions
	1. Total carbon emissions during the operational phase of the building	#DIV/0!	kgCO2			1. Total carbon emissions during the operational phase of the building	0	kgCO2
	2. Carbon emissions per unit of floor area during the operational phase of the building	#DIV/0!	kgCO2/㎡			2. Carbon emissions per unit of floor area during the operational phase of the building	#DIV/0!	kgCO2/㎡
	II. Construction phase					II. Construction phase
	1. Energy consumption	Number	Unit			1. Energy consumption	Number	Unit
	1.Gasoline	0	kg			1.Gasoline	0	kg
	2.Diesel	0	kg			2.Diesel	0	kg
	3.Electricity	0	kWh			3.Electricity	0	kWh
	2、Carbon emissions					2、Carbon emissions
	1. Total carbon emissions during the building construction stage	0	kgCO2			1. Total carbon emissions during the building construction stage	0	kgCO2
	2. Carbon emissions per unit of floor area at the building construction stage	#DIV/0!	kgCO2/㎡			2. Carbon emissions per unit of floor area at the building construction stage	#DIV/0!	kgCO2/㎡
	III. Dismantling phase					III. Dismantling phase
	1.Energy Consumption	Number	Unit			1.Energy Consumption	Number	Unit
	1.Gasoline	0	kg			1.Gasoline	0	kg
	2.Diesel	0	kg			2.Diesel	0	kg
	3.Electricity	0	kWh			3.Electricity	0	kWh
	2、Carbon emissions					2、Carbon emissions
	1. Total carbon emissions during the demolition phase of a building	0	kgCO2			1. Total carbon emissions during the demolition phase of a building	0	kgCO2
	2. Carbon emissions per unit of floor area during the demolition phase of the building	0	kgCO2/㎡			2. Carbon emissions per unit of floor area during the demolition phase of the building	#DIV/0!	kgCO2/㎡
	IV. Production and transportation of building materials					IV. Production and transportation of building materials
	1. Carbon emissions from the production of building materials	0	kg CO2e			1. Carbon emissions from the production of building materials	0	kg CO2e
	2. Carbon emissions from transportation of building materials	0	kg CO2e			2. Carbon emissions from transportation of building materials	0	kg CO2e
	3. Carbon emissions per unit of floor area in the production and transportation of building materials stage	#DIV/0!	kgCO2/㎡			3. Carbon emissions per unit of floor area in the production and transportation of building materials stage	#DIV/0!	kgCO2/㎡

## Sheet: Summary table
					Return
Building Carbon Calculations Summary
	Number	Unit		Number	Unit
Total carbon emissions from the operational phase of a building	0	kg CO2e	Carbon emissions per unit of floor area during the operation phase of a building	#DIV/0!	kgCO2/㎡
Total carbon emissions during the construction phase of a building	0	kg CO2e	Carbon emissions per unit of floor area during the construction phase of a building	#DIV/0!	kgCO2/㎡
Total carbon emissions during the demolition phase of construction	0	kg CO2e	Carbon emissions per unit of floor area during the demolition phase of construction	#DIV/0!	kgCO2/㎡
Total carbon emissions from the production phase of building materials	0	kg CO2e	Carbon emissions per unit of floor area during the production phase of building materials	#DIV/0!	kgCO2/㎡
Total carbon emissions during the transportation phase of building materials	0	kg CO2e	Carbon emissions per unit of floor area during the transportation phase of building materials	#DIV/0!	kgCO2/㎡
Total	0	kg CO2e	Carbon emissions per unit of floor area for the whole life cycle of the building	#DIV/0!	kgCO2/㎡
		0

## Sheet: Operation
						Return
	Carbon sink system for building green spaces
	Type of vegetation	Trees	Bamboo forest	Grassland	Shrubland	Scattered woods + trees on all sides + open forests	Carbon sink (kgCO2)
	Area (ha)	0	0	0	0	0	0
	Factor		Number	Unit			Data source
	CF		0.47	Tonnes of carbon / Tonnes of dry matter			IPCC 2006 Volume 4 Chapter 4 Table 4.3		Qingdao's climate zone values
	GW		4	Tonnes of dry matter/ha/year			IPCC2019 Volume IV, Chapter 4 Table 4.12
	R		0.224	Tonnes of dry matter below-ground biomass/tonnes of dry matter above-ground Biomass			IPCC2019 Volume IV, Chapter 4, Table 4.4
	Method 1
	1. HVAC system
				Type of energy	Energy consumption	Unit	Data source
	1. Cooling source			Electricity	0	kWh/yr
	2. Heat source			Electricity	0	kWh/yr
	3. Distribution systems			Electricity	0	kWh/yr
	4. Terminal air handling equipment			Electricity	0	kWh/yr
	1.1. Refrigerant use
	Serial number		Type of refrigerant	Single unit refrigerant charge (kg/unit)	Number of equipment	Equipment life (years)	Refrigerant GWP
	1		0	0	0	0	0
	2		0	0	0	0	0
	......
	Data source
	1.2. Calculations				Number	Unit	Data source
	1. Energy consumption of the HVAC system				0	kWh/yr
	2. Carbon emissions from HVAC systems				0	kgCO2/yr
	3. Carbon emissions due to refrigerant use				#DIV/0!	kgCO2/yr
	2. Domestic hot water system
					Number	Unit	Data source
	1. Design hot water temperature				0	°C
	2. Design cold water temperature				0	°C (summer)
					0	°C (winter)
	3. Hot water density				0	kg/L
	4. Hot water consumption quotas				0	L/person
	5. Number of units of water use calculation				0	Number of people or beds, whichever
	6. daily domestic hot water use hours				0
	7. Annual domestic hot water use hours				0	h
	8. hourly variation factor				0	\
	9. Domestic hot water heat provided by solar systems				0	kWh/yr
	10. Domestic hot water transmission and distribution efficiency				0	%
	11. Annual average efficiency of domestic hot water system heat sources				0	%
	2.1. Calculation				Number	Unit	Data source
	1. Hourly average heat consumption of domestic hot water				#DIV/0!	kW/h
	2. Annual heat consumption of domestic hot water				#DIV/0!	kWh/yr
	3. Annual energy consumption of domestic hot water				#DIV/0!	kWh/yr
	4. Annual carbon emissions from domestic hot water				#DIV/0!	kgCO2/yr
	3. Lighting and lift system
	3.1, Lighting (without photoelectric automatic control system)
	Types of rooms		Number of rooms	Room lighting area (m²)	Room lighting time (h)	Room lighting power density values (W/m2)	Energy consumption (kWh/a)
	1. Living room		0	0	0	0	0
	2. Bedroom		0	0	0	0	0
	3. Dining room		0	0	0	0	0
	4. Kitchen		0	0	0	0	0
	5. Bathroom		0	0	0	0	0
	6. Study room		0	0	0	0	0
						Total	0
	Data source
	3.2. Emergency lights				Number	Unit	Data source
	1. Emergency light lighting power				0	W/㎡
	2. Emergency lighting area				0	㎡
	3. Energy consumption of emergency lights				0	kWh/yr
	3.3. Calculation				Number	Unit	Data source
	1. Annual energy consumption of the lighting system				0	kWh/yr
	2. Annual carbon emissions from the lighting system				0	kgCO2/yr
	3.4. Lift
					Number	Unit	Data source
	1. Specific energy consumption				0	mWh/kgm
	2. Average annual operating hours of lifts				0	h
	3. Average annual standby hours of the lift				0	h
	4. Lift speed				0	m/s
	5. Lift rated capacity				0	kg
	6. Energy consumption when the lift is on standby				0	W
	7. Number of lifts				0	Pieces
	3.5. Calculations
					Number	Unit	Data source
	1. Annual energy consumption of lifts				0	kWh/yr
	2. Annual energy carbon emissions from lifts				0	kgCO2/yr
	4. Renewable energy system
	4.1. Solar hot water system
					Number	Unit	Data source
	1. Solar collector area				0	㎡
	2. average annual solar irradiation on the solar collector surface				0	MJ/㎡
	3. Average collector efficiency based on the total area of the collector				0	%
	4. Heat loss rate of piping and thermal storage devices				0	%
	4.2. Photovoltaic system
					Number	Unit	Data source
	1. Annual solar irradiation on the surface of the photovoltaic cell				0	kWh/㎡
	2. Conversion efficiency of photovoltaic cells				0	%
	3. Loss efficiency of a PV cell				0	%
	4. Net PV panel area of a PV cell				0	㎡
	4.3. Wind turbine
					Number	Unit	Data source
	1. Air density				0	kg/m³	GB/T51366
	2. Roughness factor based on height				0	\
	3. Site factor				0	\
	4. Surface roughness factor				0	\
	5. Annual available average wind speed				0	m/s
	6. Windward area of wind turbine blades				0	㎡
	7. wind turbine blade diameter				0	m
	8. Factor calculated from hourly wind speeds from typical meteorological year data				#DIV/0!	\
	9. Annual average energy density				0	W/㎡
	10. Conversion efficiency of the wind turbine				0	%
	4.4. Calculation
					Number	Unit	Data source
	1. annual energy supply of the solar water heating system				0	kWh
	2. Annual power generation from photovoltaic systems				0	kWh
	3. Annual electricity production from wind turbines				0	kWh
	4.5. Stage calculation
					Number	Unit	Data source
	Total energy consumption during building operation phase				#DIV/0!	kWh
	Total carbon emissions during the building operation phase				#DIV/0!	kgCO2
	Carbon emissions per unit of floor area during the building operation phase				#DIV/0!	kgCO2/㎡
	Method 2
	1. Total annual energy consumption during the operation phase
		Electricity (kWh)	Gas (m³)	Petrol (kg)	Diesel (kg)	Municipal heat (Yes/No)	Data source
	Heating	0	0	0	0	No
	Air conditioning	0	0	0	0	\
	Lighting	0	0	0	0	\
	Lift	0	0	0	0	\
	Domestic hot wate	0	0	0	0	\
	Total	0	0	0	0	\
	2. Energy provided by renewable energy systems
		Electricity (kWh)	Gas (m³)	Petrol (kg)	Diesel (kg)	Municipal heat (Yes/No)	Data source
	Heating	0	0	0	0	No
	Air conditioning	0	0	0	0	\
	Lighting	0	0	0	0	\
	Lift	0	0	0	0	\
	Domestic hot wate	0	0	0	0	\
	Total	0	0	0	0	\
	3. Phase calculation
					Number	Unit	Data source
	Total annual energy consumption during the operational phase of the building				0	kWh/yr
	Total carbon emissions during building operation phase				0	kgCO2
	Carbon emissions per unit of floor area during the building operation phase				#DIV/0!	kgCO2/㎡

## Sheet: Results
										Return
Method 1
	Name of machinery	Performance specifications	Energy consumption			Machine use shifts	Energy consumption	Data source		Small construction equipment	Quantity of work			Data source
			Petrol (kg/tablet)	Diesel (kg/tablet)	Electricity (kWh/shift)						Petrol (kg)	Diesel (kg)	Electricity (kWh)
				Quantity of work			Data source
				Petrol (kg)	Diesel (kg)	Electricity (kWh)
	Other construction drainage energy consumption
	Energy consumption of temporary construction facilities
	Energy consumption	Number	Unit
	Petrol		kg
	Diesel		kg
	Electricity		kWh
	Total carbon emissions during the construction phase of a building	0	kgCO2
	Carbon emissions per unit of floor space during the construction phase of a building	#DIV/0!	kgCO2/㎡
Method 2
		Petrol (kg)	Diesel (kg)	Electricity (kWh)	Data source			Fuel type	Carbon content per unit calorific value (tC/TJ)	Carbon oxidation rate (%)	CO2 emission factor per unit calorific value (tCO2/TJ)	Low-level calorific value(TJ/kg)	Remarks
	Component work	0	0	0				Petrol	18.9	0.98	67.91	4.3124e-05	General Rules for Calculating Comprehensive Energy Consumption (2020)
	Minor construction equipment	0	0	0				Diesel	20.2	0.98	72.59	4.2705e-05	General Rules for Calculation of Comprehensive Energy Consumption (2020)
	Measures	0	0	0
	Construction drainage	0	0	0
	Construction temporary facilities	0	0	0
	Total	0	0	0
	Energy consumption	Number	Unit
	Petrol	0	kg
	Diesel	0	kg
	Electricity	0	kWh
	Total carbon emissions during the construction phase of a building	0	kgCO2
	Carbon emissions per unit of floor space during the construction phase of a building	#DIV/0!	kgCO2/㎡

## Sheet: Demolition
								Return
Method 1
	Name of machinery	Performance specifications	Energy consumption			Machine use shifts	Energy consumption	Data source		Small construction equipment	Quantity of work			Data source
			Petrol (kg/tablet)	Diesel (kg/tablet)	Electricity (kWh/shift)						Petrol (kg)	Diesel (kg)	Electricity (kWh)
		Energy consumption			Data source
		Petrol (kg)	Diesel (kg)	Electricity (kWh)
	Energy consumption for building blasting, static breaking demolition and mechanical monolithic demolition
	Energy consumption	Number	Unit
	Petrol		kg
	Diesel		kg
	Electricity		kWh
	Total carbon emissions during the building demolition phase	0	kgCO2
	Carbon emissions per unit of floor area during the building demolition phase	0	kgCO2/㎡
Method 2
		Petrol (kg)	Diesel (kg)	Electricity (kWh)	Data source			Fuel type	Carbon content per unit calorific value (tC/TJ)	Carbon oxidation rate (%)	CO2 emission factor per unit calorific value (tCO2/TJ)	Low-level calorific value(TJ/kg)	Remarks
	Manual and mechanical demolition	0	0	0				Petrol	18.9	0.98	67.91	4.3124e-05	General Rules for Calculating Comprehensive Energy Consumption (2020)
	Building blasting, static breakage demolition and mechanical monolithic demolition	0	0	0				Diesel	20.2	0.98	72.59	4.2705e-05	General Rules for Calculating Comprehensive Energy Consumption (2020)
	Total	0	0	0
	Energy consumption	Number	Unit
	Petrol	0	kg
	Diesel	0	kg
	Electricity	0	kWh
	Total carbon emissions during the building demolition phase	0	kgCO2
	Carbon emissions per unit of floor area during the building demolition phase	#DIV/0!	kgCO2/㎡

## Sheet: Production and transport of bui
								Return
	Carbon emissions from the production and transport phase of building materials
	Building material production phase
	Type of building material	Unit	Number	Data source	Carbon emission factor for building materials (kgCO2/unit)	Data source	Carbon emissions from building materials (kgCO2)		Low value waste	Unit	Number	Data source	Carbon emissions from building materials (kgCO2)
							0
							0
							0
							0
							0
							0
							0
							0
							0
							0
							0
							0
							0
							0
							0
							0
							0
							0
							0
							0
							0
							0		Renewable waste	Unit	Number	Data source	Carbon emissions from building materials (kgCO2)
							0
							0
							0
							0
							0
							0
							0
							0
							0
							0
							0
							0
							0
							0
							0
							0
							0
							0
							0
							0
							0
							0
							0
							0
							0
							0
							0
							0
							0
							0
							0
							0
							0
							0
							0
							0
							0
							0
							0
							0
							0
							0
							0
							0
							0
							0
							0
							0
							0
							0
							0
							0
							0
							0
							0
							0
							0
							0
							0
							0
							0
							0
							0
							0
							0
							0
							0
							0
						Total	0
	Building materials transportation phase			When the actual transport distance is unknown, the average transport distance provided by GB/T51366 is used
	Types of building materials	Unit	Number	单位换算（t）	Data source	Actual transport distance (km)	Data source	Average transport distance (km)	Mode of transport	Data source	Carbon emissions from building material transport (kgCO2)		Waste generation during the demolition phase	Mode of transport	Actual transport distance (km)	Average transport distance (km)
	Reinforcing steel (inside and outside φ10)
	Reinforcing steel (φ10 or more)
	Ironwork
	Section steel
	Galvanized steel plate (δ0.5)
	Galvanized steel plate (δ0.75)
	Galvanized steel plate (δ1)
	Bridge (300mm×150mm)
	Bridge for weak power (200mm×100mm)
	Bridge (GPQ1A-300×150J-G)
	Bridge (GPQ1A-400×150J-G)
	Hot-dip galvanized steel pipe (DN25)
	Hot-dip galvanized steel pipe (DN32)
	Hot-dip galvanized steel pipe (DN40)
	Galvanized steel pipe (DN50)
	Galvanized steel pipe (DN65)
	Hot-dip galvanised steel pipe (DN80)
	Galvanised steel pipe (DN100)
	Galvanised steel pipe (DN150)
	Concrete (C35P8)
	Concrete (C30P8)
	Concrete (C35)
	Concrete (C30)
	Concrete (C25)
	Concrete (C15)
	Silicate cement (325#)
	White cement
	Lime
	Net sand (m³)
	Gravel
	Northeast pine, imported pine
	Specification material
	Load-bearing clay bricks (KP1, DS1)
	Load-bearing clay bricks (DS2)
	Non-load-bearing clay porous bricks (KF17)
	Mechanized red brick
	Flooring bricks cylinder bricks (30mm)
	Face brick (within 0.015m2)
	Grade A fire doors
	Three-proof doors
	Grade B Fire Door
	Grade C fire door
	Aluminium alloy floor bullet door
	Aluminum alloy sliding window
	Aluminum alloy sliding door
	Hollow glass plastic steel windows
	Roofing polystyrene foam panels
	Extruded plastic insulation board
	Copper pipes (DN15)
	Copper pipe (D19.1 including insulation)
	Copper core (within 1.5m㎡ of the cross-section of the wire threaded in the pipe)
	Copper core (within 2.5m㎡ of the cross-section of the wire threaded in the pipe)
	Copper core (within 4m㎡ of the cross-section of the wire threaded in the pipe)
	Insulated wire (RVS-2×1.5)
	Insulated wire (RVS-2×1.0)
	Insulated wire (BV-2.5)
	Insulated wire (BV-4)
	Copper-core insulated conductors (BV-10)
	Coaxial Cable (SYKV-75-5-1)
	Coaxial Cable (SYKV-75-7)
	Coaxial Cable (SYKV-75-9)
	Copper core (within 2.5m㎡ of the cross-section of the conductor of the lighting line threaded in the pipe)
	Copper core (within 4m㎡ of the cross-section of the conductor of the lighting line threaded in the tube)
	Copper-core (within 10m㎡ of the cross-section of the conductor of the lighting line threaded in the tube)
	Copper-core power cables (within 35m㎡)
	Copper-core power cables (within 240m㎡)
	Reddan anti-rust paint
	Blending paint
	Emulsion paint
	Plastic drainage pipe
	PP-R plastic water supply pipe (D25)
	Sound-insulating porous plastic drainage pipe (D75)
	Sound-insulated porous plastic drainage pipe (D100)
	Sound-insulated porous plastic drainage pipe (D150)
	Plastic pipe PVC16
	Plastic pipe PVC20
	Plastic pipe PVC32
	Steel-plastic composite pipe (D≤25mm)
	Steel-plastic composite pipe (D≤32mm)
	Steel-plastic composite pipe (D≤40mm)
	Steel-plastic composite pipe (D≤50mm)
	Steel-plastic composite pipe (D≤65mm)
	Steel-plastic composite pipe (D≤80mm)
	Steel-plastic composite pipe (D≤100mm)
	Steel-plastic composite pipe (D≤150mm)
	Steel-plastic composite pipe (D≤200mm)
	Granite strip stone
	Chlorinated polyethylene coil plane
	Petroleum asphalt (No.30)
	Polyurethane coated film (2.5mm)
										Total
	Phase Calculation		Number	Unit
	Carbon emissions from the production phase of building materials		0	kg CO2
	Carbon emissions from the transport phase of building materials		0	kg CO2
	Carbon emissions per unit of floor space in the production and transport phase of building materials		#DIV/0!	kgCO2/㎡

## Sheet: A Major Energy Carbon Emission 
Appendix A Key Energy Carbon Emission Factors
						Return
A.0.1 Fossil fuel carbon emission factors
Classification	Fuel type	Carbon content per unit calorific value (tC/TJ)	Carbon oxidation rate (%)	CO2 emission factor per unit calorific value (tCO2/TJ)
Solid Fuels	Anthracite	27.4	0.94	94.44
	Bituminous coal	26.1	0.93	89
	Lignite	28	0.96	98.56
	Coking Coal	25.4	0.98	91.27
	Coal	33.6	0.9	110.88
	Coke	29.5	0.93	100.6
	Other Coking Products	29.5	0.93	100.6
Liquid fuels	Crude Oil	20.1	0.98	72.23
	Fuel oil	21.1	0.98	75.82
	Gasoline	18.9	0.98	67.91
	Diesel	20.2	0.98	72.59
	Jet fuel	19.5	0.98	70.07
	General Fuel	19.6	0.98	70.43
	NGL Natural Gas Condensate	17.2	0.98	61.81
	LPG Liquefied Petroleum Gas	17.2	0.98	61.81
	Refinery Dry Gas	18.2	0.98	65.4
	Petroleum Brain	20	0.98	71.87
	Bitumen	22	0.98	79.05
	Lubricants	20	0.98	71.87
	Petroleum coke	27.5	0.98	98.82
	Petrochemical feedstock oil	20	0.98	71.87
	Other oil products	20	0.98	71.87
Gaseous fuels	Natural gas	15.3	0.99	55.54
A.0.2. Other energy emission factors
Type of energy		Default carbon content (tC/TJ)	Default oxidation factor	Effective CO2 emission factor (tCO2/TJ)
				Default value	95% confidence interval
					low	High
Municipal waste (non-biological proportion)		25	1	91.7	73.3	121
Industrial waste		39	1	143	110	183
Waste oil		20	1	73.3	72.2	74.4
Peat		28.9	1	106	100	108
Solid biofuels	Wood/wood waste	30.5	1	112	95	132
	Sulphite waste liquor (black liquor)	26	1	95.3	80.7	110
	Charcoal	30.5	1	112	95	132
	Other major solid biofuels	27.3	1	100	84.7	117
Liquid biofuels	Bio-gasoline	19.3	1	70.8	59.8	84.3
	Biodiesel	19.3	1	70.8	59.8	84.3
	Other liquid biofuels	21.7	1	79.6	67.1	95.3
Gaseous biofuels	Landfill gas	14.9	1	54.6	46.2	66
	Sludge gas	14.9	1	54.6	46.2	66
	Other biogases	14.9	1	54.6	46.2	66
Other non-fossil fuels	Municipal waste (% biomass)	27.3	1	100	84.7	117

[truncated: 5 more sheets: B Building operating characteri, C Commonly used construction ma, D Carbon emission factors for b, E Carbon emission factors for b, F Average grid CO2 emission fac]
